# Supplementary material for: Clinical Outcomes of Single Mosaic Embryo Transfer: High-Level or Low-Level Mosaic Embryo, Does It Matter?
Source: MDPI journal article supplement (doi:10.3390/jcm9061695), 2020-06-02
Supplement: s1 [file s1]

Lee women hospital

| 胚胎品質     | TE-1 Type           | TE Result                                                                                                                                                                                                                                                                                                                                                                                                                                    | ICM Type            | ICM Result                                                                                                                                                                                                                                                                                                                              |
|----------|---------------------|----------------------------------------------------------------------------------------------------------------------------------------------------------------------------------------------------------------------------------------------------------------------------------------------------------------------------------------------------------------------------------------------------------------------------------------------|---------------------|-----------------------------------------------------------------------------------------------------------------------------------------------------------------------------------------------------------------------------------------------------------------------------------------------------------------------------------------|
| BDDB     | Mosaicism-Whole     | <a href="#">Mosaicism, XX. (60% mosaic loss of chr5)</a>                                                                                                                                                                                                                                                                                                                                                                                     | Mosaicism-Whole     | <a href="#">Mosaicism, XX. (40% mosaic gain of chr5)</a>                                                                                                                                                                                                                                                                                |
| BHBA     | Mosaicism-Whole     | <a href="#">Mosaicism, XX. (80% mosaic gain of chr15)</a>                                                                                                                                                                                                                                                                                                                                                                                    | Mosaicism-Segmental | <a href="#">Mosaicism, XX. (30% mosaic gain of 19p13.3~12)</a>                                                                                                                                                                                                                                                                          |
| BHBB     | Mosaicism-Whole     | <a href="#">Mosaicism, XX. (80% mosaic gain of chr22; 30% mosaic gain of 3p14.2~q11.1 )</a>                                                                                                                                                                                                                                                                                                                                                  | Mosaicism-Whole     | <a href="#">Mosaicism, XX. (80% mosaic gain of chr22)</a>                                                                                                                                                                                                                                                                               |
| BDDB     | Mosaicism-Whole     | <a href="#">Mosaicism, XX. (70% mosaic gain of chr22)</a>                                                                                                                                                                                                                                                                                                                                                                                    | Aneuploidy-Whole    | <a href="#">Aneuploidy, XX, +22. (70% mosaic loss of Xp22.33~11.21)</a>                                                                                                                                                                                                                                                                 |
| BHBC     | Mosaicism-Whole     | <a href="#">Mosaicism, XX. (80% mosaic loss of chr20; 30% mosaic gain of 9q12~22.1)</a>                                                                                                                                                                                                                                                                                                                                                      | Aneuploidy-Whole    | <a href="#">Abnormal, XX, -20.</a>                                                                                                                                                                                                                                                                                                      |
| BHBB     | Mosaicism-Whole     | <a href="#">Mosaicism, XY. (80% mosaic loss of chr16)</a>                                                                                                                                                                                                                                                                                                                                                                                    | Aneuploidy-Whole    | <a href="#">Abnormal, XY, -16. (40% mosaic gain of 13q14.11~14.3)</a>                                                                                                                                                                                                                                                                   |
| BHBB     | Mosaicism-Whole     | <a href="#">Mosaicism, XX. (30% mosaic gain of chr2)</a>                                                                                                                                                                                                                                                                                                                                                                                     | Mosaicism-Whole     | <a href="#">Mosaicism, XX. (40% mosaic gain of chr2; 30% mosaic gain of 19p13.3~13.11; 30% mosaic loss of 14q32.12~32.33(29%), Xq26.3~28(28%), Xq21.1~21.33)</a>                                                                                                                                                                        |
| BHBB     | Mosaicism-Whole     | <a href="#">Mosaicism, XY. (70% mosaic loss of chr22; 40% mosaic gain of 17q24.2~25.3; 40% mosaic loss of 3p26.3~24.3; 30% mosaic loss of chr2)</a>                                                                                                                                                                                                                                                                                          | Aneuploidy-Whole    | <a href="#">Aneuploidy, XY, -22.</a>                                                                                                                                                                                                                                                                                                    |
| BHBB     | Mosaicism-Whole     | <a href="#">Mosaicism, XX. (40% mosaic loss of chr5)</a>                                                                                                                                                                                                                                                                                                                                                                                     | Mosaicism-Segmental | <a href="#">Mosaicism, XX. (40% mosaic gain of 3q13.12~29)</a>                                                                                                                                                                                                                                                                          |
| BHBB     | Mosaicism-Whole     | <a href="#">Mosaicism, XX. (60% mosaic loss of chr15)</a>                                                                                                                                                                                                                                                                                                                                                                                    | Mosaicism-Segmental | <a href="#">Mosaicism, XX. (40% mosaic loss of 16p11.2~q24.3)</a>                                                                                                                                                                                                                                                                       |
| BHBB     | Mosaicism-Whole     | <a href="#">Mosaicism, XX. (80% mosaic loss of chr16; 30% mosaic loss of 9q22.2~22.33)</a>                                                                                                                                                                                                                                                                                                                                                   | Aneuploidy-Whole    | <a href="#">Aneuploidy, XX, -16.</a>                                                                                                                                                                                                                                                                                                    |
| BHBC     | Mosaicism-Whole     | <a href="#">Mosaicism, XX. (30% mosaic gain of chr6(26%), Xp22.33~22.2(28%))</a>                                                                                                                                                                                                                                                                                                                                                             | Mosaicism-Segmental | <a href="#">Mosaicism, XX. (30% mosaic loss of 1q32.1~44)</a>                                                                                                                                                                                                                                                                           |
| BHBB     | Mosaicism-Whole     | <a href="#">Mosaicism, XX. (80% mosaic gain of chr22)</a>                                                                                                                                                                                                                                                                                                                                                                                    | Aneuploidy-Whole    | <a href="#">Aneuploidy, XX, +22..</a>                                                                                                                                                                                                                                                                                                   |
| BHBB     | Mosaicism-Segmental | <a href="#">Mosaicism, XY. (80% mosaic loss of 12q14.3~24.33)</a>                                                                                                                                                                                                                                                                                                                                                                            | E                   | Euploidy, XY.                                                                                                                                                                                                                                                                                                                           |
| BDDB     | Mosaicism-Segmental | <a href="#">Mosaicism, XY. (60% mosaic loss of 2p25.3~13.2; 40% mosaic loss of 6q12~14.3)</a>                                                                                                                                                                                                                                                                                                                                                | E                   | Euploidy, XY.                                                                                                                                                                                                                                                                                                                           |
| BDDB     | Mosaicism-Segmental | <a href="#">Mosaicism, XY. (50% mosaic loss of 9q33.2~34.3; 30% mosaic gain of 4q21.23~35.1&amp; 5p14.3~q13.3; 30% mosaic loss of 14q31.1~32.33)</a>                                                                                                                                                                                                                                                                                         | E                   | Euploidy, XY.                                                                                                                                                                                                                                                                                                                           |
| BDDB     | Mosaicism-Segmental | <a href="#">Mosaicism, XX. (poor DNA quality) (50% mosaic loss of 4q13.1~4q34.3; 40% mosaic loss of Xp22.33~11.4 &amp; Xq13.3~28; 30% mosaic gain of 1p32.3~21.1; 30% mosaic loss of 18p11.32~q21.1)</a>                                                                                                                                                                                                                                     | E                   | Euploidy, XX.                                                                                                                                                                                                                                                                                                                           |
| BHBB     | Mosaicism-Segmental | <a href="#">Mosaicism, XY. (80% mosaic loss of 5q13.2~35.3; 40% mosaic loss of 1q23.3~44)</a>                                                                                                                                                                                                                                                                                                                                                | Mosaicism-Segmental | <a href="#">Mosaicism, XY. (30% mosaic loss of 5q13.2~35.3 &amp; 4q34.1~35.2)</a>                                                                                                                                                                                                                                                       |
| BDDB     | Mosaicism-Segmental | <a href="#">Mosaicism, XY. (50% mosaic loss of 22q13.1~13.33)</a>                                                                                                                                                                                                                                                                                                                                                                            | Mosaicism-Segmental | <a href="#">Mosaicism, XY. (70% mosaic loss of 22q13.1~13.33)</a>                                                                                                                                                                                                                                                                       |
| BDDB     | Mosaicism-Segmental | <a href="#">Mosaicism, XX. (60% mosaic gain of 8q11.23~24.3; 50% mosaic loss of Xq21.1~21.33; 40% mosaic loss of 2p25.3~24.1)</a>                                                                                                                                                                                                                                                                                                            | E                   | Euploidy, XX.                                                                                                                                                                                                                                                                                                                           |
| BHCB     | Mosaicism-Segmental | <a href="#">Mosaicism, XX. (40% mosaic loss of 16q12.2~24.3; 30% mosaic gain of chrX)</a>                                                                                                                                                                                                                                                                                                                                                    | Mosaicism-Segmental | <a href="#">Mosaicism, XX. (40% mosaic loss of chr3 &amp; 5p15.33~15.1; 30% mosaic gain of chr6 &amp; 16q13~24.3)</a>                                                                                                                                                                                                                   |
| BHBA     | Mosaicism-Segmental | <a href="#">Mosaicism, XX. (70% mosaic loss of 7p22.3~14.3; 50% mosaic loss of 7q35~36.3; 30% mosaic loss of 7p14.2~q35; 30% mosaic gain of chr17 &amp; chr19 &amp; 20p13~q13.2)</a>                                                                                                                                                                                                                                                         | E                   | Euploidy, XX.                                                                                                                                                                                                                                                                                                                           |
| BDDB     | Mosaicism-Segmental | <a href="#">Mosaicism, XX. (40% mosaic loss of 1q41~44)</a>                                                                                                                                                                                                                                                                                                                                                                                  | Mosaicism-Whole     | <a href="#">Mosaicism, XX. (30% mosaic gain of chr19)</a>                                                                                                                                                                                                                                                                               |
| BDDB out | Mosaicism-Segmental | <a href="#">Mosaicism, XX. (50% mosaic loss of 13q31.1~34)</a>                                                                                                                                                                                                                                                                                                                                                                               | E                   | Euploidy, XX.                                                                                                                                                                                                                                                                                                                           |
| BDDB     | Mosaicism-Segmental | <a href="#">Mosaicism, XX. (60% mosaic loss of 8p23.3~11.21 &amp; 10q23.1~26.3; 40% mosaic gain of 6p25.3~21.2; 40% mosaic loss of 8p11.21~q24.3)</a>                                                                                                                                                                                                                                                                                        | E                   | Euploidy, XX. (Poor DNA quality)                                                                                                                                                                                                                                                                                                        |
| BDDB     | Mosaicism-Segmental | <a href="#">Mosaicism, XY. (40% mosaic gain of 14q11.2~24.1 &amp; 16p13.3~11.2; 40% mosaic loss of 13q31.1~34 &amp; 17q23.2~25.3; 30% mosaic gain of 8p23.3~q24.22 &amp; 19p13.3~q13.33 &amp; chr22; 30% mosaic loss of 1q23.3~44 &amp; chr6)</a>                                                                                                                                                                                            | Mosaicism-Segmental | <a href="#">Mosaicism, XY.(50% mosaic loss of 15q11.2~22.2; 40% mosaic gain of 3q25.2~29 &amp; 6q14.3~25.3 &amp; 10q24.2~26.11; 40% mosaic loss of 8p23.3~21.2 &amp; 16p13.3~q12.2 &amp; chr21; 30% mosaic gain of 1q21.3~44 &amp; 2q22.1~37.1 &amp; 8q22.2~24.23; 30% mosaic loss of 12p13.33~11.1 &amp; chr20) (poor DNA quality)</a> |
| BDDB     | Mosaicism-Segmental | <a href="#">Mosaicism, XX. (60% mosaic loss of 2q31.1~37.3; 40% mosaic gain of 11p11.2~q13.4 &amp; 13q13.3~14.2; 40% mosaic loss of 2q22.1~31.1 &amp; 2p25.3~16.3 &amp; 11q23.3~25 &amp; Xp22.33~21.2; 30% mosaic gain of 1p36.23~q25.3 &amp; 4p16.1~q23 &amp; 5p15.1~q14.1 &amp; 12p13.33~q13.2; 30% mosaic loss of 3q26.1~29 &amp; 6p25.3~12.3 &amp; 6q14.1~27 &amp; 13q22.3~34 &amp; 14q24.3~32.33 &amp; 16p11.2~q24.3 &amp; Xq25~28)</a> | E                   | Euploidy, XX.                                                                                                                                                                                                                                                                                                                           |
| BDDB     | Mosaicism-Segmental | <a href="#">Mosaicms, XX.(30% mosaic gain of 12p12.3~11.21 &amp; 17p11.2~q21.32)</a>                                                                                                                                                                                                                                                                                                                                                         | E                   | Euploidy, XX.                                                                                                                                                                                                                                                                                                                           |
| BDDB     | Mosaicism-Segmental | <a href="#">Mosaicms, XX.(50% mosaic loss of 7p22.3~7p11.2)</a>                                                                                                                                                                                                                                                                                                                                                                              | E                   | Euploidy, XX.                                                                                                                                                                                                                                                                                                                           |
| BDDB     | Mosaicism-Segmental | <a href="#">Mosaicms, XX. (50% mosaic gain of 3p14.3~q13.31; 40% mosaic loss of 4p15.1~13, 17q11.2~23.3; 30% mosaic loss of chr7, chr11, chr13)</a>                                                                                                                                                                                                                                                                                          | Mosaicism-Whole     | <a href="#">Mosaicms, XX.(40% mosaic loss of chr10, chr20)</a>                                                                                                                                                                                                                                                                          |
| BHBB     | Mosaicism-Segmental | <a href="#">Mosaicism, XX. (50% mosaic loss of 17q24.2~25.3)</a>                                                                                                                                                                                                                                                                                                                                                                             | Mosaicism-Segmental | <a href="#">Mosaicism, XX. (30% mosaic loss of 17q24.3~25.3)</a>                                                                                                                                                                                                                                                                        |
| BDDB     | Mosaicism-Segmental | <a href="#">Mosaicism, XX. (30% mosaic loss of Xq12~21.33)</a>                                                                                                                                                                                                                                                                                                                                                                               | E                   | Euploidy, XX.                                                                                                                                                                                                                                                                                                                           |
| BHBB     | Mosaicism-Segmental | <a href="#">Mosaicism, XX. (40% mosaic loss of Xq27.2~28)</a>                                                                                                                                                                                                                                                                                                                                                                                | Mosaicism-Segmental | <a href="#">Mosaicism, XX. (30% mosaic loss of 5p15.33~15.2)</a>                                                                                                                                                                                                                                                                        |
| BDDB     | Mosaicism-Segmental | <a href="#">Mosaicism, XX. (30% mosaic gain of 5p14.1~q15, 11p12~q12.2; 30% mosaic loss of Xq21.1~28)</a>                                                                                                                                                                                                                                                                                                                                    | Mosaicism-Segmental | <a href="#">Mosaicism, XX. (30% mosaic loss of 4p16.3~16.1, 10q26.12~26.3)</a>                                                                                                                                                                                                                                                          |
| BHBB     | Mosaicism-Segmental | <a href="#">Mosaicism, XY. (70% mosaic loss of 7p22.3~11.2; 40% mosaic loss of 6q25.3~27; 30% mosaic gain of 20p12.3~11.23(27%))</a>                                                                                                                                                                                                                                                                                                         | E                   | Euploidy,XY.                                                                                                                                                                                                                                                                                                                            |
| BHAB     | Mosaicism-Segmental | <a href="#">Mosaicism, XY. (30% mosaic gain of 5p12~q11.2, 6q22.31~23.2; 30% mosaic loss of 13q31.1~31.3)</a>                                                                                                                                                                                                                                                                                                                                | E                   | Euploidy,XY.                                                                                                                                                                                                                                                                                                                            |
| BHBB     | Mosaicism-Segmental | <a href="#">Mosaicism, XX. (50% mosaic loss of 17p13.3~11.1; 30% mosaic gain of 17q11.2~25.3(27%); 30% mosaic loss of 2p25.3~24.1(25%), 7q34~36.3)</a>                                                                                                                                                                                                                                                                                       | E                   | Euploidy, XX.                                                                                                                                                                                                                                                                                                                           |
| BHBB     | Mosaicism-Segmental | <a href="#">Mosaicism, XX. (30% mosaic loss of Xq27.3~28)</a>                                                                                                                                                                                                                                                                                                                                                                                | E                   | Euploidy, XX.                                                                                                                                                                                                                                                                                                                           |
| BHBC     | Mosaicism-Segmental | <a href="#">Mosaicism, XX (30% mosaic loss of 11q24.2~25)</a>                                                                                                                                                                                                                                                                                                                                                                                | E                   | Euploidy, XX.                                                                                                                                                                                                                                                                                                                           |
| BHBC     | Mosaicism-Segmental | <a href="#">Mosaicism, XX. (30% mosaic gain of 1p36.22~36.12, 2p24.1~11.1, 12q15~23.1; 30% mosaic loss of 13q33.1~34)</a>                                                                                                                                                                                                                                                                                                                    | E                   | Euploidy, XX.                                                                                                                                                                                                                                                                                                                           |
| BHBC     | Mosaicism-Segmental | <a href="#">Mosaicism, XY. (80% mosaic loss of 6q12~27; 30% mosaic loss of 8q23.1~24.3(28%), 9p21.3~13.3(26%), chrY)</a>                                                                                                                                                                                                                                                                                                                     | Mosaicism-Segmental | <a href="#">Mosaicism, XY. (60% mosaic loss of 6q12~27)</a>                                                                                                                                                                                                                                                                             |
